# Conceptual models of entrainment, jet-lag, and seasonality

Isao T. Tokuda<sup>1</sup>, Christoph Schmal<sup>2</sup>, Bharath Ananthasubramaniam<sup>3</sup> and Hanspeter Herzel<sup>2,3,\*</sup>

<sup>1</sup> Department of Mechanical Engineering, Ritsumeikan University, Kusatsu-shi, Shiga, Japan.

<sup>2</sup> Institute for Theoretical Biology, Humboldt Universität zu Berlin, Berlin, Germany.

<sup>3</sup> Institute for Theoretical Biology, Charité - Universitätsmedizin Berlin, Berlin, Germany.

Correspondence\*:

Hanspeter Herzel

[h.herzel@biologie.hu-berlin.de](mailto:h.herzel@biologie.hu-berlin.de)

## 2 ABSTRACT

Understanding entrainment of circadian rhythms is a central goal of chronobiology. Many factors, such as period, amplitude, *Zeitgeber* strength, and day-length, govern entrainment ranges and the phase of entrainment. Using global optimization, we derive conceptual models with just three free parameters (period, amplitude, relaxation rate) that reproduce known phenotypic features of vertebrate clocks: relatively small phase response curves (PRCs), fast re-entrainment after jet-lag, and seasonal variability to track light onset or offset. Since optimization found multiple sets of model parameters, we can study this model ensemble to gain insight into the underlying design principles. We find that amplitudes control the size of PRCs, that fast relaxation supports short jet-lag, and that specific periods allow reasonable seasonal phase shifts. *Arnold* onions of representative models visualize strong dependencies of entrainment on periods, relative *Zeitgeber* strength, and photoperiod.

**Keywords:** circadian rhythms, amplitude-phase model, parameter optimization, jet-lag, phase response curve, entrainment, seasonality

## 1 INTRODUCTION

### 16 1.1 Entrainment and oscillator theory

The circadian clock can be regarded as a system of coupled oscillators, be it the neuronal network in the SCN (Hastings et al., 2018) or the ‘orchestra’ of body clocks (Dibner et al., 2010). Furthermore, the intrinsic clock is entrained by *Zeitgebers* such as light, temperature and feeding. The concept of interacting oscillators (Huygens, 1986; Van der Pol and Van der Mark, 1927; Kuramoto, 2012; Strogatz, 2004) can contribute to the understanding of entrainment (Winfree, 1980). The theory of periodically driven self-sustained oscillators is based on the concept of “*Arnold* tongues” (Pikovsky et al., 2003; Granada et al., 2009). *Arnold* tongues mark the ranges of periods and *Zeitgeber* strengths in which entrainment occurs (Abraham et al., 2010). The range of periods over which entrainment occurs is called the “range of entrainment” (Aschoff and Pohl, 1978). If seasonal variations are also considered, the entrainment regions have been termed “*Arnold* onions” (Schmal et al., 2015). Within these parameter regions, amplitudes and

27 entrainment phases can vary drastically. Amplitude expansion due to periodic forcing is termed resonance  
28 (Duffing, 1918). Of central importance in chronobiology is the variability of the entrainment phase,  
29 since the coordination of the intrinsic clock phase with the environment provides evolutionary advantages  
30 (Aschoff, 1960; Ouyang et al., 1998; Dodd et al., 2005).

## 31 **1.2 Phenomenological amplitude-phase models**

32 After the discovery of transcriptional feedback loops (Hardin et al., 1990), many mathematical  
33 models focussed on gene-regulatory networks (Leloup and Goldbeter, 2003; Forger and Peskin, 2003;  
34 Becker-Weimann et al., 2004). However, most available data on phase response curves (PRCs) (Johnson,  
35 1992), entrainment ranges (Aschoff and Pohl, 1978), and phases of entrainment (Rémi et al., 2010)  
36 are based on organismic data. Thus it seems reasonable, to study phenomenological models that are  
37 directly based on these empirical features. There is a long tradition of heuristic amplitude-phase models  
38 in chronobiology (Klotter, 1960; Wever, 1962; Pavlidis, 1973; Daan and Berde, 1978; Winfree, 1980;  
39 Kronauer et al., 1982).

40 Here, we examine the limits of the capability of such heuristic amplitude-phase models to reproduce  
41 fundamental properties of circadian entrainment. To this end, we combine the traditional amplitude-phase  
42 modeling approach with recent oscillator theory and global optimization to identify minimal models that  
43 can reproduce essential features of mammalian clocks: relatively small PRCs (Honma et al., 2003), fast  
44 re-entrainment after jet-lag (Yamazaki et al., 2000), and seasonal variability (Daan and Aschoff, 1975).

## 45 **1.3 Empirical data as model constraints**

46 In order to optimize phenomenological models, reasonable constraints based on experimental  
47 observations have to be formulated. In mammals, the strong coupling of SCN neurons constitutes  
48 a strong oscillator (Abraham et al., 2010; Granada et al., 2013) with quite small PRCs (Comas et al.,  
49 2006). Even bright light pulses of 6.7h duration can shift the clock by just a few hours (Khalsa et al.,  
50 2003). Consequently, we constrain our models to have small PRCs with just 1h advance and 1h delay.  
51 Interestingly, despite the robustness of the SCN rhythms, a surprisingly fast recovery from jet-lag is  
52 observed (Reddy et al., 2002; Vansteensel et al., 2003). Along the lines of a previous optimization study  
53 (Locke et al., 2008), we request that our models reduce the jet-lag to 50 % within 2 days. The third  
54 constraint refers to the well-known seasonal variability of circadian clocks (Pittendrigh and Daan, 1976b;  
55 Rémi et al., 2010). It has been reported that phase markers can lock to dusk or dawn for varying day-  
56 length. This implies that the associated phases change by 4h, if we switch from 16:8 LD conditions to  
57 8:16 LD conditions. Thus, we test whether or not our optimized models allow such pronounced phase  
58 differences between 16:8 and 8:16 LD cycles.

## 59 **2 METHODS**

### 60 **2.1 Optimization of amplitude-phase model**

60 As a model of an autonomous circadian oscillator, we consider the following amplitude-phase model  
61 (Abraham et al., 2010):

$$\frac{dr}{dt} = \lambda r(A - r), \quad (1)$$

$$\frac{d\varphi}{dt} = \omega. \quad (2)$$

The system is described in polar coordinates of radius  $r$  and angle  $\varphi$ , having a limit cycle with amplitude  $A$  and angular frequency  $\omega$ . Any perturbation away from the limit cycle will relax back with a relaxation rate  $\lambda$ . This oscillator model can be represented in Cartesian  $(x, y)$ -coordinates as

$$\frac{dx}{dt} = -\lambda x(r - A) - \omega y + Z(t), \quad (3)$$

$$\frac{dy}{dt} = -\lambda y(r - A) + \omega x, \quad (4)$$

where  $r = \sqrt{x^2 + y^2}$ . The oscillator receives a *Zeitgeber* signal

$$Z(t) = \begin{cases} 1 & \text{if } t \bmod T < \kappa T \\ 0 & \text{otherwise,} \end{cases} \quad (5)$$

where  $T$  represents the period of the *Zeitgeber* signal and  $\kappa$  determines the photoperiod (*i.e.*, fraction of time during  $T$  hours when the lights are on). The amplitude-phase model provides one of the simplest mathematical frameworks to study limit cycle oscillations, which have been discussed in the context of circadian rhythms (Wever, 1962; Winfree, 1980; Kronauer et al., 1982).

The amplitude-phase model (1),(2) has three unknown parameters  $\{A, \omega, \lambda\}$ . These parameters were optimized to satisfy the model constraints as described in 1.3. The parameter optimization is based on minimization of a cost function. The cost function takes a set of parameters as arguments, evaluates the model using those parameters, and then returns a “score” indicating goodness of fit. Scores may only be positive, where the closer a fit gets to the score of zero, the better the fit becomes. The cost function is defined as

$$E(A, \omega, \lambda) = \frac{(T_e - 48h)^2}{(24h)^2} + \frac{(\Delta\varphi_{max} - 1h)^2}{(1h)^2} + \frac{(\Delta\psi - 6h)^2}{(24h)^2}, \quad (6)$$

where  $T_e$ ,  $\Delta\varphi_{max}$ ,  $\Delta\psi$  represent half-time to re-entrainment, maximum phase-shift, and seasonal phase variability, respectively. The denominators can be regarded as tolerated ranges. If the values of  $T_e$ ,  $\Delta\varphi_{max}$ , and  $\Delta\psi$  deviate 24h, 1h and 24h from their target values, a score of three results. All parameter sets discussed in this paper had optimized scores below 0.1, *i.e.*, the constraints are well satisfied. Each quantity is defined and calculated as follows.

When the circadian oscillator is entrained to the *Zeitgeber* signal, their phase difference  $\psi = \Psi - \varphi$  ( $\Psi = 2\pi t/T$ : phase of the *Zeitgeber*) converges to a stable phase  $\psi_e$ , that is called “phase of entrainment.” The half-time to re-entrainment  $T_e$  denotes the amount of time required for the oscillator to recover from a jet-lag. As the *Zeitgeber* phase is advanced by  $\Delta\Psi$ , the phase difference becomes  $\psi = \psi_e + \Delta\Psi$ .  $T_e$  quantifies how long it takes until the advanced phase is reduced to less than half of the original jet-lag (*i.e.*,  $|\psi - \psi_e| < 0.5\Delta\Psi$ ). In our computation, this quantity was averaged over 24 different times during the day, at which 6h-advanced jet-lag was applied. Next, the seasonal phase variability, which quantifies variability of the phase of entrainment over photoperiod from long day (16:8 LD) to short day (8:16 LD), is computed as  $\Delta\psi = \max_{\kappa \in [1/3, 2/3]} \psi_e - \min_{\kappa \in [1/3, 2/3]} \psi_e$ . Finally, the maximum phase-shift is given by  $\Delta\varphi_{max} = \max_{\varphi} |PRC(\varphi)|$ , where  $PRC(\varphi)$  represents phase response curve of the free-running oscillator, to which 6h light pulse is injected at its phase of  $\varphi$ .

To find optimal parameter values, the cost function was minimized by a particle swarm optimization algorithm (Eberhart and Kennedy, 1995; Trelea, 2003). Search ranges of the parameter values were set to  $A \in [0, 5]$ ,  $\omega \in [2\pi/30, 2\pi/18]$ ,  $\lambda \in [0, 0.5]$ . Altogether 300 sets of parameter values were obtained. From the estimated parameters, the intrinsic period was obtained as  $\tau = 2\pi/\omega$ .

## 2.2 Simulations of jet-lag, phase response, and seasonality

Figure 1 illustrates our modeling approach. In Fig. 1a, the amplitude-phase equations (1) and (2) are visualized in the phase plane together with the driving *Zeitgeber* switching between 0 (dark) and 1 (light) for varying photoperiods. Two values of the amplitude relaxation rate  $\lambda$  illustrate how  $\lambda$  affects the decay of perturbations. Starting from an initial condition, small relaxation rate gives rise to a long transient until its convergence to limit cycle, while large relaxation rate exhibits only a short transient. Figure 1b shows the oscillations in a 3-dimensional phase space. Two coordinates ( $x$  and  $y$ ) span the phase plane of the endogenous oscillator. The vertical axis represents the phase of the *Zeitgeber*. The red line marks the periodically forced limit cycle. The jump from 24 h to 0 h reflects simply the periodic nature of our daily time.

Interestingly, the relaxation after jet-lag (see also the more common presentations in Fig. 2) can be visualized as a transient convergence to the red limit cycle via the black line after a 6h phase change due to jet-lag (blue arrow). Such a relaxation might be accompanied by amplitude changes (not apparent) and by steady phase shifts from day to day (note that the jump from 24 h to 0 h is shifted day by day). After a few days, the red line is approached implying a vanishing jet-lag.

## 3 RESULTS

### 3.1 Models reproduce small PRC, short jet-lag, and seasonality

We performed 200 successful parameter optimizations leading to an ensemble of parameter sets. We discuss in this section the parameters with a PRC of 1h delay and advance. In Figs. S1 & S2, we also present a parameter set obtained with a modified optimization: in that case, we requested a PRC with 2h delay and advance.

Figure 2 shows results for a representative model obtained via optimization. The PRC in Fig. 2a is almost sinusoidal with maximal delays and advances of 1h as requested by optimization. Simulations with different photoperiods are shown in Fig. 2b. It is evident that there are major phase shifts due to varying photoperiods. The jet-lag visualized in Fig. 2c is surprisingly short for such a relatively small PRC. Fig. 2d illustrates the re-entrainment after a jet-lag applied on day 10. Note, that no pronounced amplitude changes were observed.

It is remarkable that such simple models with just three free parameters can reproduce phenotypic features successfully. In particular, short jet-lag durations for quite small PRCs are surprising. In the following we exploit the ensembles of parameter sets to understand the underlying principles.

### 3.2 Optimization produced highly clustered parameter sets

In this section, we focus on the 200 parameter sets with the  $\pm 1$ h PRCs exemplified in Fig. 2 (see Figs. S1 for  $\pm 2$ h PRCs).

The possible search ranges for our parameters were quite large (periods between 18 and 30h, amplitudes between 0 and 5, and amplitude relaxation rates between 0 and  $0.5h^{-1}$ ). The histograms from the

130 optimized parameter sets demonstrate that the search lead to quite specific values: amplitudes of about  
131  $2.1 \pm 0.04$ , periods around  $23.3 \pm 0.1$  h, and large relaxation rates of  $0.4 \pm 0.1 \text{ h}^{-1}$ .

132 The optimized amplitude can be easily understood from the constraint via PRCs: for a given pulse  
133 strength the PRC shrinks monotonically with increasing amplitude (Pittendrigh, 1981; Vitaterna et al.,  
134 2006). Consequently, the amplitude of about 2.1 implies a  $\pm 1$ h PRC. Indeed, our optimizations with a  
135  $\pm 2$ h PRC lead to smaller amplitudes around 1.2.

136 Amplitude relaxation rates range between 0.1 and  $0.5 \text{ h}^{-1}$ . A value of  $0.1 \text{ h}^{-1}$  corresponds to a half-  
137 life of the amplitude perturbations of about 7h, while a value of  $0.5 \text{ h}^{-1}$  corresponds to a half-life  
138 of the amplitude perturbations of about 1.4h. Thus all values in the histogram imply relatively fast  
139 amplitude relaxation. In Abraham et al. (2010), we termed limit cycles with fast amplitude relaxation  
140 “rigid oscillators.” Interestingly, Comas et al. (2007) found that light pulses separated by 10h shift phases  
141 almost independently. This observation is consistent with fast amplitude relaxation rates. Jet-lag is a  
142 specific type of a transient (compare Fig. 1b). Thus it seems reasonable that fast amplitude relaxation  
143 helps to achieve short transients after a jet-lag.

144 The most surprising result of our optimization is the narrow range of intrinsic periods of about 23.3h. We  
145 provide in the discussion arguments that specific periods allow appropriate seasonal flexibility (compare  
146 Fig. 4). In short, at specific parts of *Arnold* onions (i.e. the entrainment regions in the  $\kappa - T$  parameter  
147 plane), the required 4h phase differences are found giving a reasonable phase shifts between 16:8 LD and  
148 8:16 LD.

149 Figure 3d illustrates that the optimized parameter values are not independent. For example, shorter  
150 periods are associated with larger amplitude. A possible explanation is that short periods imply larger  
151 effective pulse strength (a 6h pulse is than relatively long) leading to larger amplitude in order to have the  
152 requested PRC amplitude.

153 In order to evaluate the robustness of our optimization approach, we generated also 100 parameter sets  
154 with PRCs with about a 2h advance and delay. In these cases we found intrinsic periods of  $24.6 \pm 0.1$  h and  
155 amplitudes  $1.15 \pm 0.1$ . The relaxation rates and amplitude-period correlations were similar to the results  
156 with PRCs of about 1h advance and delay, compare Fig. 3 and Fig. S1.

### 157 3.3 Arnold onions provide insights on the optimized parameters

158 To systematically investigate the impact of photoperiod ( $\kappa$ ) and Zeitgeber period ( $T$ ) on entrainment  
159 properties, we analyze in Figure 4 two *Arnold* onions for representative parameter sets with a short period  
160 and a  $\pm 1$  h PRC as well as a large period and a  $\pm 2$  h PRC. Interestingly, the *Arnold* onions are tilted, i.e.  
161 the DD periods at photoperiod  $\kappa = 0$  are smaller than the LL periods at photoperiod  $\kappa = 1$  as predicted  
162 by *Aschoff's rule* for nocturnal animals (Aschoff, 1960). The largest entrainment range is found around  
163 a photoperiod of 0.5 as predicted by Wever (1964). As expected, a larger PRC implies a wider range of  
164 entrainment, compare sizes of the Arnold onion in Fig. 4 (a) and (b).

165 The phase of entrainment is color-coded in Fig. 4. It is evident that the phases vary strongly with  
166 the external period  $T$ . There are theoretical predictions that phases change by about 12h (Wever, 1964;  
167 Granada et al., 2013; Bordyugov et al., 2015) in the horizontal direction. Interestingly, the variation of  
168 photoperiods in the vertical direction implies also very pronounced variations of the entrainment phase.  
169 Consequently, we could find many parameter sets with about 4h phase shift between photoperiods of  
170  $\kappa = 1/3$  (8:16 LD) and of  $\kappa = 2/3$  (16:8 LD).



## 4 DISCUSSION

### 4.1 Optimized models reproduce phenotypic features

The circadian clock of vertebrates is characterized by a relatively small type 1 PRC, by a narrow entrainment range, by fast recovery from jet-lag, and by pronounced seasonal flexibility. We addressed the question whether or not these phenotypic features can be reproduced by simple amplitude-phase models with just 3 free parameters: period, amplitude, and relaxation time. To our surprise, we found many parameter sets via global optimization that reproduce the phenotypic features.

The availability of many parameter sets derived from random optimization allows extraction of essential properties of successful models. It turned out that the amplitude  $A$  is adjusted to reproduce small PRCs for a given *Zeitgeber* strength  $Z$ . According to limit cycle theory (Pavlidis, 1969; Peterson, 1980), the strength of a perturbation is governed by the ratio  $Z/A$  of *Zeitgeber* strength to amplitude. This implies that large limit cycles exhibit small PRCs for a fixed *Zeitgeber* strength (Vitaterna et al., 2006).

In all suitable models, we found relatively fast amplitude relaxation rates with half-lives of perturbations below 5h. This “rigidity” of limit cycles (Abraham et al., 2010) can support fast relaxation to the new phase after jet-lag (compare Fig. 1b). Interestingly, Comas et al. (2007) found that light pulses separated by 10h act almost independently. This observation is consistent with fast relaxation rates after light pulses.

In order to reproduce seasonality we optimized our model under the constraint that 16:8 and 8:16 LD cycles have entrainment phases that are about 4h apart. This implies that the phase could follow dusk or dawn (Daan and Aschoff, 1975). In other words, we requested that the entrainment phase depends strongly on the photoperiod. As illustrated in Fig. 4, such a strong dependency is indeed reproduced by our simple amplitude-phase models. Our optimization procedure selected specific periods that lead to a 4h phase variation between photoperiods  $\kappa = 1/3$  and  $\kappa = 2/3$ . Note, that other periods can give large phase differences as well (compare the large vertical phase variations in Fig. 4).

### 4.2 Relevance of phenomenological amplitude-phase models

Simplistic models as studied in this paper are quite generally applicable. In principle, they could be used to describe single cells, tissue clocks, and organismic data. For single cells, damped stochastic oscillators can represent the observations also surprisingly well (Westermarck et al., 2009). Such models have vanishingly small amplitudes, smaller relaxation rates, and are driven by stochastic terms. Otherwise their complexity is comparable to our models discussed above.

Complex models with multiple gene-regulatory feedback loops (Mirsky et al., 2009; Pokhilko et al., 2010; Relógio et al., 2011; Woller et al., 2016) could be reduced to amplitude-phase models simply by extracting periods, amplitudes, and relaxation rates from simulations. However, in such cases the amplitudes are not uniquely defined, since there are many dynamic variables.

### 4.3 How to define circadian amplitudes?

This difficulty to define amplitudes points to a general problem in chronobiology. Most studies focus on periods and entrainment phases. Limit cycle theory emphasizes that amplitudes are essential to understand PRCs and entrainment. It is, however, not evident which amplitudes properly represent the limit cycle oscillator. Some studies consider gene expression levels (Lakin-Thomas et al., 1991; Wang et al., 2019) or reporter amplitudes (Leise et al., 2012), and other studies quantify activity rhythms (Bode et al., 2011; Erzberger et al., 2013). Since the ratio of *Zeitgeber* strength to amplitude  $Z/A$  governs PRCs and

210 entrainment phases, we suggest that amplitudes could be quantified indirectly: the stronger the response  
211 to physiological perturbations, the smaller the amplitude. This approach leads to the concept of strong and  
212 weak oscillators (Abraham et al., 2010; Granada et al., 2013). Strong oscillators are robust and have small  
213 PRCs and entrainment ranges but large phase variability (Granada et al., 2013). In this sense, wild-type  
214 vertebrate clocks represent strong oscillators in contrast to single cell organisms or plants. Indeed, the  
215 review of Aschoff and Pohl (1978) demonstrates impressively these properties.

216 Interestingly, a reduction in relative amplitudes (i.e., amplitudes as a fraction of the mesor) can reduce  
217 jet-lag drastically, since resetting signals are much more efficient (Yamaguchi et al., 2013; An et al., 2013;  
218 Jagannath et al., 2013).

#### 219 4.4 Arnold onions quantify entrainment

220 As shown in Fig. 4, *Arnold* onions represent in a compact manner entrainment ranges and phases of  
221 entrainment. Astonishingly, even quite basic models lead to really complex variations of entrainment  
222 phases. As expected, the period mismatch  $T-\tau$  has a rather strong effect on the entrainment  
223 phase. This reflects the well-known feature that short intrinsic periods  $\tau$  have earlier entrainment  
224 phases (“chronotypes”) (Pittendrigh and Daan, 1976a; Mellow et al., 1999; Duffy et al., 2001). These  
225 associations are reflected in the horizontal phase variations in the *Arnold* onion. Interestingly, the vertical  
226 phase variability is also quite large. This observation demonstrates that also the effective *Zeitgeber*  
227 strength  $Z/A$  and the photoperiod affect the phase of entrainment strongly. Consequently, the expected  
228 correlations between periods and entrainment phase could be masked by varying amplitudes, *Zeitgeber*  
229 strength, and photoperiods. In other words, chronotypes are governed by periods only if relative *Zeitgeber*  
230 strength and photoperiod are kept constant.

231 The complexity of entrainment phase regulation indicates that generic properties of coupled oscillators  
232 can provide useful insight in chronobiology. In particular, basic amplitude-phase models can help to  
233 understand the control of jet-lag and seasonality.

## CONFLICT OF INTEREST STATEMENT

234 The authors declare that the research was conducted in the absence of any commercial or financial  
235 relationships that could be construed as a potential conflict of interest.

## AUTHOR CONTRIBUTIONS

236 H. H. designed the study. I. T. T. performed the model simulations. I. T. T., B. A., C. S., and H. H.  
237 discussed the results. H. H. wrote the main text. I. T. T., B. A., and C. S. revised the text.

## FUNDING

238 I. T. T. acknowledges financial support from the Japan Society for the Promotion of Science (JSPS)  
239 (KAKENHI Nos. 16K00343, 17H06313, 18H02477, 19H01002). B. A., C. S. and H. H. acknowledge  
240 support from the Deutsche Forschungsgemeinschaft (DFG) (SPP 2041, TRR 186-A16, TRR 186-A17).  
241 In addition, C. S. acknowledges support from the DFG (SCH3362/2-1) and the JSPS (PE17780).

## ACKNOWLEDGMENTS

242 The authors thank Serge Daan (†), Achim Kramer, and Adrian Granada for stimulating discussions.

## REFERENCES

- 243 Abraham, U., Granada, A. E., Westermarck, P. O., Heine, M., Kramer, A., and Herzl, H. (2010). Coupling  
244 governs entrainment range of circadian clocks. *Molecular Systems Biology* 6, 438. doi:10.1038/msb.  
245 2010.92
- 246 An, S., Harang, R., Meeker, K., Granados-Fuentes, D., Tsai, C. A., Mazuski, C., et al. (2013). A  
247 neuropeptide speeds circadian entrainment by reducing intercellular synchrony. *Proceedings of the*  
248 *National Academy of Sciences* 110, E4355–E4361
- 249 Aschoff, J. (1960). Exogenous and endogenous components in circadian rhythms. In *Cold Spring Harbor*  
250 *symposia on quantitative biology* (Cold Spring Harbor Laboratory Press), vol. 25, 11–28
- 251 Aschoff, J. and Pohl, H. (1978). Phase relations between a circadian rhythm and its zeitgeber within the  
252 range of entrainment. *Naturwissenschaften* 65, 80–84
- 253 Becker-Weimann, S., Wolf, J., Herzl, H., and Kramer, A. (2004). Modeling feedback loops of the  
254 mammalian circadian oscillator. *Biophysical Journal* 87, 3023–3034
- 255 Bode, B., Shahmoradi, A., Rossner, M. J., and Oster, H. (2011). Genetic interaction of *per1* and *dec1/2*  
256 in the regulation of circadian locomotor activity. *Journal of Biological Rhythms* 26, 530–540
- 257 Bordyugov, G., Abraham, U., Granada, A., Rose, P., Imkeller, K., Kramer, A., et al. (2015). Tuning the  
258 phase of circadian entrainment. *Journal of The Royal Society Interface* 12. doi:10.1098/rsif.2015.0282
- 259 Comas, M., Beersma, D., Spoelstra, K., and Daan, S. (2006). Phase and period responses of the circadian  
260 system of mice (*mus musculus*) to light stimuli of different duration. *Journal of Biological Rhythms*  
261 21, 362–372
- 262 Comas, M., Beersma, D., Spoelstra, K., and Daan, S. (2007). Circadian response reduction in light and  
263 response restoration in darkness: a! Hskeleton ! light pulse PRC study in mice (*mus musculus*). *Journal*  
264 *of Biological Rhythms* 22, 432–444
- 265 Daan, S. and Aschoff, J. (1975). Circadian rhythms of locomotor activity in captive birds and mammals:  
266 their variations with season and latitude. *Oecologia* 18, 269–316
- 267 Daan, S. and Berde, C. (1978). Two coupled oscillators: simulations of the circadian pacemaker in  
268 mammalian activity rhythms. *Journal of Theoretical Biology* 70, 297–313
- 269 Dibner, C., Schibler, U., and Albrecht, U. (2010). The mammalian circadian timing system: organization  
270 and coordination of central and peripheral clocks. *Annual Review of Physiology* 72, 517–549
- 271 Dodd, A. N., Salathia, N., Hall, A., Kévei, E., Tóth, R., Nagy, F., et al. (2005). Plant circadian clocks  
272 increase photosynthesis, growth, survival, and competitive advantage. *Science* 309, 630–633
- 273 Duffing, G. (1918). *Erzwungene Schwingungen bei veränderlicher Eigenfrequenz und ihre technische*  
274 *Bedeutung*. 41-42 (F. Vieweg & Sohn)
- 275 Duffy, J. F., Rimmer, D. W., and Czeisler, C. A. (2001). Association of intrinsic circadian period with  
276 morningness–eveningness, usual wake time, and circadian phase. *Behavioral Neuroscience* 115, 895–  
277 899



- 278 Eberhart, R. and Kennedy, J. (1995). Particle swarm optimization. In *Proceedings of the IEEE*  
279 *international conference on neural networks* (Citeseer), vol. 4, 1942–1948
- 280 Erzberger, A., Hampp, G., Granada, A., Albrecht, U., and Herzel, H. (2013). Genetic redundancy  
281 strengthens the circadian clock leading to a narrow entrainment range. *Journal of The Royal Society*  
282 *Interface* 10, 20130221
- 283 Forger, D. B. and Peskin, C. S. (2003). A detailed predictive model of the mammalian circadian clock.  
284 *Proceedings of the National Academy of Sciences* 100, 14806–14811
- 285 Granada, A. E., Bordyugov, G., Kramer, A., and Herzel, H. (2013). Human chronotypes from a theoretical  
286 perspective. *PLoS One* 8, e59464
- 287 Granada, A. E., Hennig, R. M., Ronacher, B., Kramer, A., and Herzel, H. (2009). Phase response curves:  
288 elucidating the dynamics of coupled oscillators. *Methods in Enzymology* 454, 1–27
- 289 Hardin, P. E., Hall, J. C., and Rosbash, M. (1990). Feedback of the drosophila period gene product on  
290 circadian cycling of its messenger RNA levels. *Nature* 343, 536–540
- 291 Hastings, M. H., Maywood, E. S., and Brancaccio, M. (2018). Generation of circadian rhythms in the  
292 suprachiasmatic nucleus. *Nature Reviews Neuroscience* 19, 453–469
- 293 Honma, K.-i., Hashimoto, S., Nakao, M., and Honma, S. (2003). Period and phase adjustments of human  
294 circadian rhythms in the real world. *Journal of Biological Rhythms* 18, 261–270
- 295 Huygens, C. (1986). *Horologium oscillatorium* (“The pendulum clock, or geometrical demonstrations  
296 concerning the motion of pendula as applied to clocks” translated by Richard J. Blackwell) (Iowa State  
297 University Press, Ames, Iowa)
- 298 Jagannath, A., Butler, R., Godinho, S. I., Couch, Y., Brown, L. A., Vasudevan, S. R., et al. (2013). The  
299 CRTC1-SIK1 pathway regulates entrainment of the circadian clock. *Cell* 154, 1100–1111
- 300 Johnson, C. H. (1992). Phase response curves: what can they tell us about circadian clocks. In *Circadian*  
301 *clocks from cell to human* (Hokkaido University Press, Sapporo), 209–249
- 302 Khalsa, S. B. S., Jewett, M. E., Cajochen, C., and Czeisler, C. A. (2003). A phase response curve to single  
303 bright light pulses in human subjects. *The Journal of Physiology* 549, 945–952
- 304 Klotter, K. (1960). Theoretical analysis of some biological models. In *Cold Spring Harbor symposia on*  
305 *quantitative biology* (Cold Spring Harbor Laboratory Press), vol. 25, 189–196
- 306 Kronauer, R. E., Czeisler, C. A., Pilato, S. F., Moore-Ede, M. C., and Weitzman, E. D. (1982).  
307 Mathematical model of the human circadian system with two interacting oscillators. *American Journal*  
308 *of Physiology-Regulatory, Integrative and Comparative Physiology* 242, R3–R17
- 309 Kuramoto, Y. (2012). *Chemical oscillations, waves, and turbulence*, vol. 19 (Springer Science & Business  
310 Media)
- 311 Lakin-Thomas, P. L., Brody, S., and Coté, G. G. (1991). Amplitude model for the effects of mutations and  
312 temperature on period and phase resetting of the neurospora circadian oscillator. *Journal of Biological*  
313 *Rhythms* 6, 281–297
- 314 Leise, T. L., Wang, C. W., Gitis, P. J., and Welsh, D. K. (2012). Persistent cell-autonomous circadian  
315 oscillations in fibroblasts revealed by six-week single-cell imaging of per2:: Luc bioluminescence.  
316 *PloS One* 7, e33334

- 317 Leloup, J.-C. and Goldbeter, A. (2003). Toward a detailed computational model for the mammalian  
318 circadian clock. *Proceedings of the National Academy of Sciences* 100, 7051–7056
- 319 Locke, J. C., Westermarck, P. O., Kramer, A., and Herzog, H. (2008). Global parameter search reveals  
320 design principles of the mammalian circadian clock. *BMC Systems Biology* 2, 22
- 321 Merrow, M., Brunner, M., and Roenneberg, T. (1999). Assignment of circadian function for the  
322 neurospora clock gene frequency. *Nature* 399, 584–586
- 323 Mirsky, H. P., Liu, A. C., Welsh, D. K., Kay, S. A., and Doyle, F. J. (2009). A model of the cell-  
324 autonomous mammalian circadian clock. *Proceedings of the National Academy of Sciences* 106,  
325 11107–11112
- 326 Ouyang, Y., Andersson, C. R., Kondo, T., Golden, S. S., and Johnson, C. H. (1998). Resonating circadian  
327 clocks enhance fitness in cyanobacteria. *Proceedings of the National Academy of Sciences* 95, 8660–  
328 8664
- 329 Pavlidis, T. (1969). Populations of interacting oscillators and circadian rhythms. *Journal of Theoretical*  
330 *Biology* 22, 418–436
- 331 Pavlidis, T. (1973). The free-run period of circadian rhythms and phase response curves. *The American*  
332 *Naturalist* 107, 524–530
- 333 Peterson, E. L. (1980). A limit cycle interpretation of a mosquito circadian oscillator. *Journal of*  
334 *Theoretical Biology* 84, 281–310
- 335 Pikovsky, A., Rosenblum, M., and Kurths, J. (2003). *Synchronization: a universal concept in nonlinear*  
336 *sciences*, vol. 12 (Cambridge University Press)
- 337 Pittendrigh, C. S. (1981). Circadian systems: entrainment. In *Biological Rhythms* (Springer). 95–124
- 338 Pittendrigh, C. S. and Daan, S. (1976a). A functional analysis of circadian pacemakers in nocturnal  
339 rodents iv. entrainment: Pacemaker as clock. *Journal of Comparative Physiology* 106, 291–331
- 340 Pittendrigh, C. S. and Daan, S. (1976b). A functional analysis of circadian pacemakers in nocturnal  
341 rodents v. pacemaker structure: A clock for all seasons. *Journal of Comparative Physiology* 106,  
342 333–355
- 343 Pokhilko, A., Hodge, S. K., Stratford, K., Knox, K., Edwards, K. D., Thomson, A. W., et al. (2010).  
344 Data assimilation constrains new connections and components in a complex, eukaryotic circadian clock  
345 model. *Molecular Systems Biology* 6, 416
- 346 Reddy, A., Field, M., Maywood, E., and Hastings, M. (2002). Differential resynchronisation of circadian  
347 clock gene expression within the suprachiasmatic nuclei of mice subjected to experimental jet lag.  
348 *Journal of Neuroscience* 22, 7326–7330
- 349 Relógio, A., Westermarck, P. O., Wallach, T., Schellenberg, K., Kramer, A., and Herzog, H. (2011).  
350 Tuning the mammalian circadian clock: robust synergy of two loops. *PLoS Computational Biology*  
351 7, e1002309
- 352 Rémi, J., Merrow, M., and Roenneberg, T. (2010). A circadian surface of entrainment: varying  $t$ ,  $\tau$ , and  
353 photoperiod in neurospora crassa. *Journal of Biological Rhythms* 25, 318–328
- 354 Schmal, C., Myung, J., Herzog, H., and Bordyugov, G. (2015). A theoretical study on seasonality.  
355 *Frontiers in Neurology* 6, 94
- 356 Strogatz, S. (2004). *Sync: The emerging science of spontaneous order* (Penguin UK)

- 357 Trelea, I. C. (2003). The particle swarm optimization algorithm: convergence analysis and parameter  
358 selection. *Information Processing Letters* 85, 317–325
- 359 Van der Pol, B. and Van der Mark, J. (1927). Frequency demultiplication. *Nature* 120, 363–364
- 360 Vansteensel, M. J., Yamazaki, S., Albus, H., Deboer, T., Block, G. D., and Meijer, J. H. (2003).  
361 Dissociation between circadian *per1* and neuronal and behavioral rhythms following a shifted  
362 environmental cycle. *Current Biology* 13, 1538–1542
- 363 Vitaterna, M. H., Ko, C. H., Chang, A.-M., Buhr, E. D., Fruechte, E. M., Schook, A., et al. (2006).  
364 The mouse clock mutation reduces circadian pacemaker amplitude and enhances efficacy of resetting  
365 stimuli and phase–response curve amplitude. *Proceedings of the National Academy of Sciences* 103,  
366 9327–9332
- 367 Wang, B., Kettenbach, A. N., Zhou, X., Loros, J. J., and Dunlap, J. C. (2019). The phospho-code  
368 determining circadian feedback loop closure and output in neurospora. *Molecular Cell* 74, 771–784
- 369 Westermarck, P. O., Welsh, D. K., Okamura, H., and Herzog, H. (2009). Quantification of circadian rhythms  
370 in single cells. *PLoS Comput Biol* 5, e1000580. doi:10.1371/journal.pcbi.1000580
- 371 Wever, R. (1962). Zum Mechanismus der biologischen 24-Stunden-Periodik. *Kybernetik* 1, 139–154
- 372 Wever, R. (1964). Zum Mechanismus der biologischen 24-Stunden-Oeriodik: III. Mitteilung Anwendung  
373 der Modell-Gleichung. *Kybernetik* 2, 127–144
- 374 Winfree, A. T. (1980). *The geometry of biological time* (Springer-Verlag, New York, Heidelberg and  
375 Berlin)
- 376 Woller, A., Duez, H., Staels, B., and Lefranc, M. (2016). A mathematical model of the liver circadian  
377 clock linking feeding and fasting cycles to clock function. *Cell Reports* 17, 1087–1097
- 378 Yamaguchi, Y., Suzuki, T., Mizoro, Y., Kori, H., Okada, K., Chen, Y., et al. (2013). Mice genetically  
379 deficient in vasopressin *v1a* and *v1b* receptors are resistant to jet lag. *Science* 342, 85–90
- 380 Yamazaki, S., Numano, R., Abe, M., Hida, A., Takahashi, R.-i., Ueda, M., et al. (2000). Resetting central  
381 and peripheral circadian oscillators in transgenic rats. *Science* 288, 682–685

## FIGURE CAPTIONS

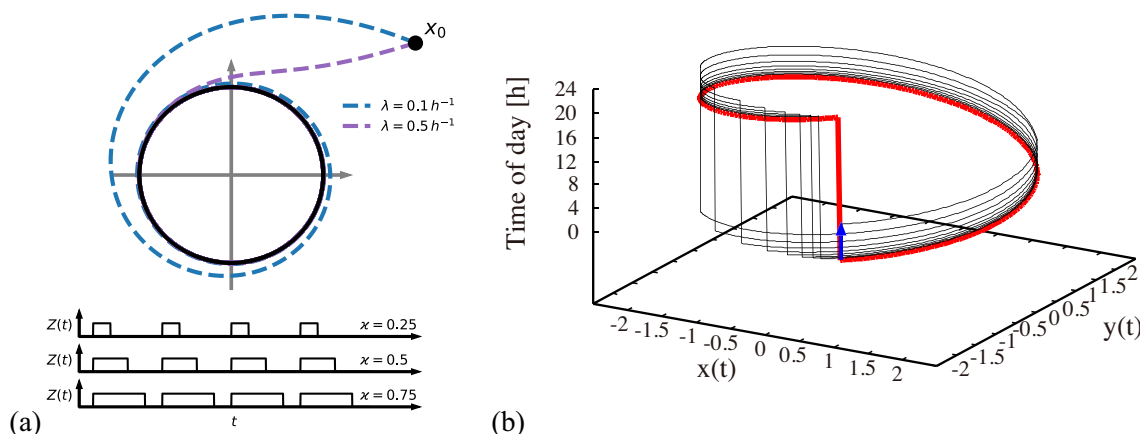

**Figure 1.** Visualization of the amplitude-phase model. (a) Schematic illustration of the amplitude-phase oscillator model forced by a *Zeitgeber* (light) signal of different photoperiods  $\kappa$ . Starting from the initial condition  $x_0$ , a small relaxation rate ( $\lambda = 0.1 \text{ h}^{-1}$ ) gives rise to long transient until its convergence back to the limit cycle, while transients for large relaxation rates ( $\lambda = 0.5 \text{ h}^{-1}$ ) are short. (b) The re-entrainment process of the oscillator after its phase is shifted by a 6h-advanced jet-lag. The red line represents the jet-lag shifted trajectory that the system converges to. The blue arrow indicates the 6h jet-lag.

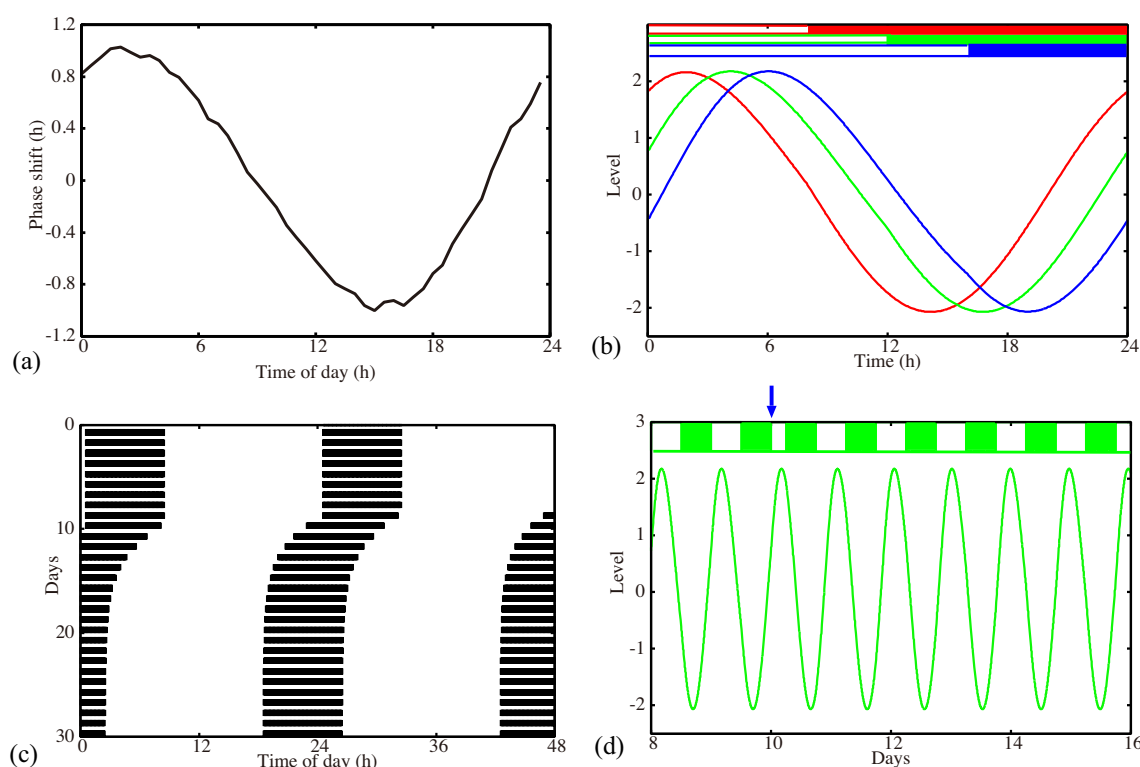

**Figure 2.** Properties of our amplitude-phase model for a representative optimized parameter set. (a) Phase response curve with respect to 6h light pulse. (b) Waveforms  $x(t)$  of the oscillator entrained to *Zeitgeber* signal with 8:16 LD (red), 12:12 LD (green), and 16:8 LD (blue). (c) Actogram drawn for the oscillators, to which a 6h advancing jet-lag was induced on day 10. (d) Time-trace  $x(t)$  of the oscillators, to which a 6h advancing jet-lag was induced on day 10. Model parameters:  $\tau = 23.36\text{h}$ ,  $A = 2.063$ ,  $\lambda = 0.386\text{h}^{-1}$  with  $\omega = \frac{2\pi}{\tau}$ .

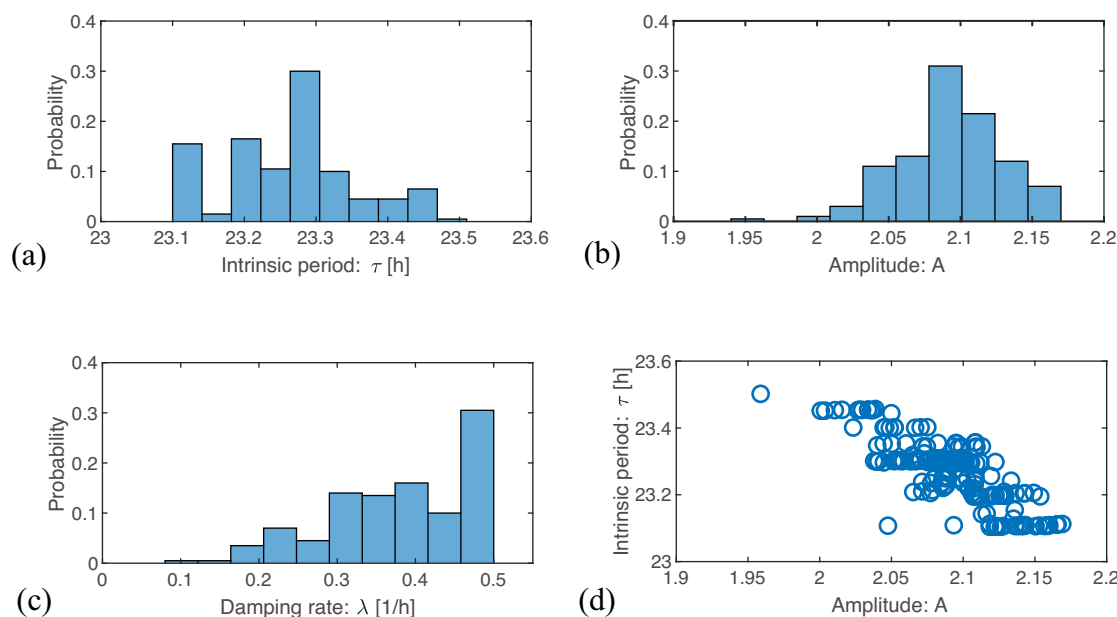

**Figure 3.** Parameter values in the optimized ensemble. (a-c) Distributions of the optimized parameter values for  $\tau$  ( $= 2\pi/\omega$ ),  $A$ , and  $\lambda$ , respectively. (d) Scatter plots of amplitude  $A$  against intrinsic period  $\tau$  drawn for the 200 sets of optimized parameters.

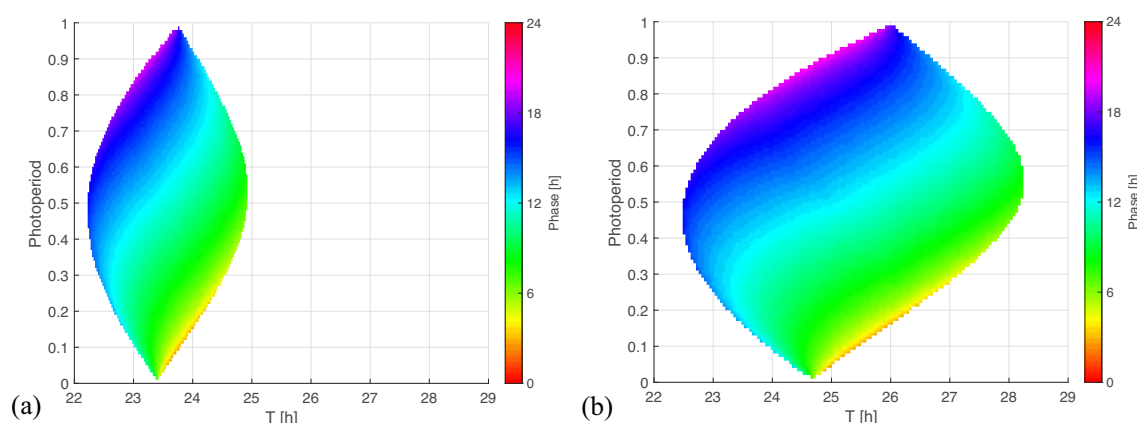

**Figure 4.** Arnold onions for the two PRC constraints. (a,b) 1:1 entrainment ranges in the  $\tau$ - $T$  parameter plane (Arnold onions). Entrainment phases were determined by numerical simulations and have been color-coded within the region of entrainment. Panel (a) depicts an Arnold onion for an optimized parameter set with a  $\pm 1$ h-PRC, a short-period  $\tau = 23.36$ h,  $A = 2.063$ , and  $\lambda = 0.386$ h $^{-1}$ . Panel (b) shows an Arnold onion for an optimized parameter set with a  $\pm 2$ h-PRC, a long-period  $\tau = 24.64$ h,  $A = 1.144$ ,  $\lambda = 0.50$ h $^{-1}$ .



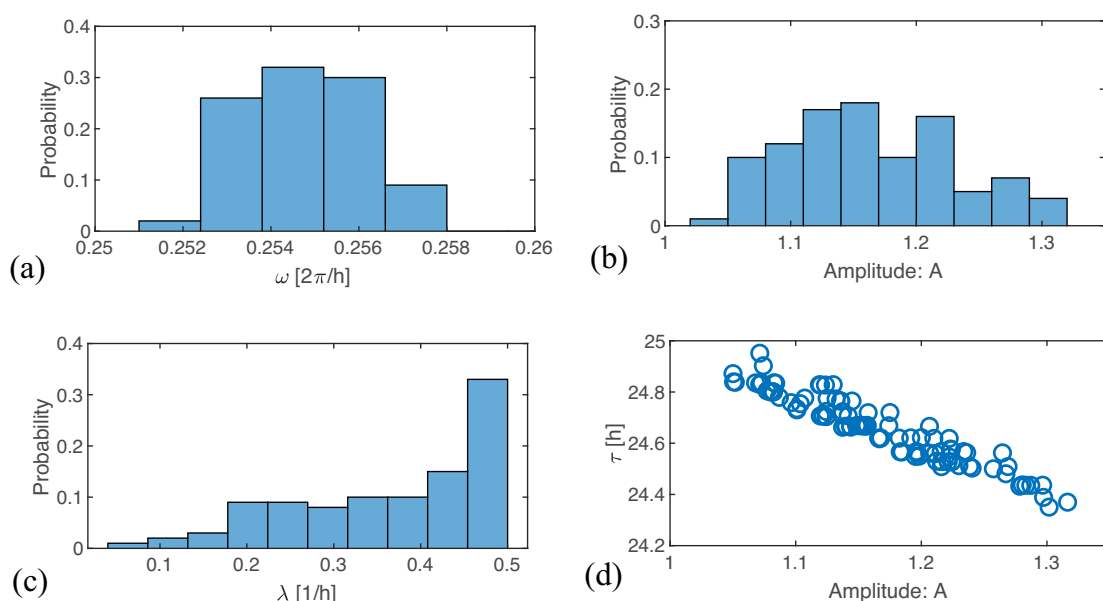

**Figure S1.** Results of parameter optimization based on cost function  $E(A, \omega, \lambda) = \frac{(T_e - 48)^2}{(24)^2} + \frac{(\Delta\varphi_{max} - 2)^2}{(1)^2} + \frac{(\Delta\psi - 6)^2}{(24)^2}$ , where  $\pm 2$ h PRC was requested. (a-c) Distributions of the 100 optimized parameter sets for  $\tau$  ( $24.6 \pm 0.16$  h),  $A$  ( $1.2 \pm 0.07$ ),  $\lambda$  ( $0.37 \pm 0.12$ ), respectively. (d) Scatter plots of amplitude  $A$  against intrinsic period  $\tau$  drawn for 100 sets of optimized parameters.

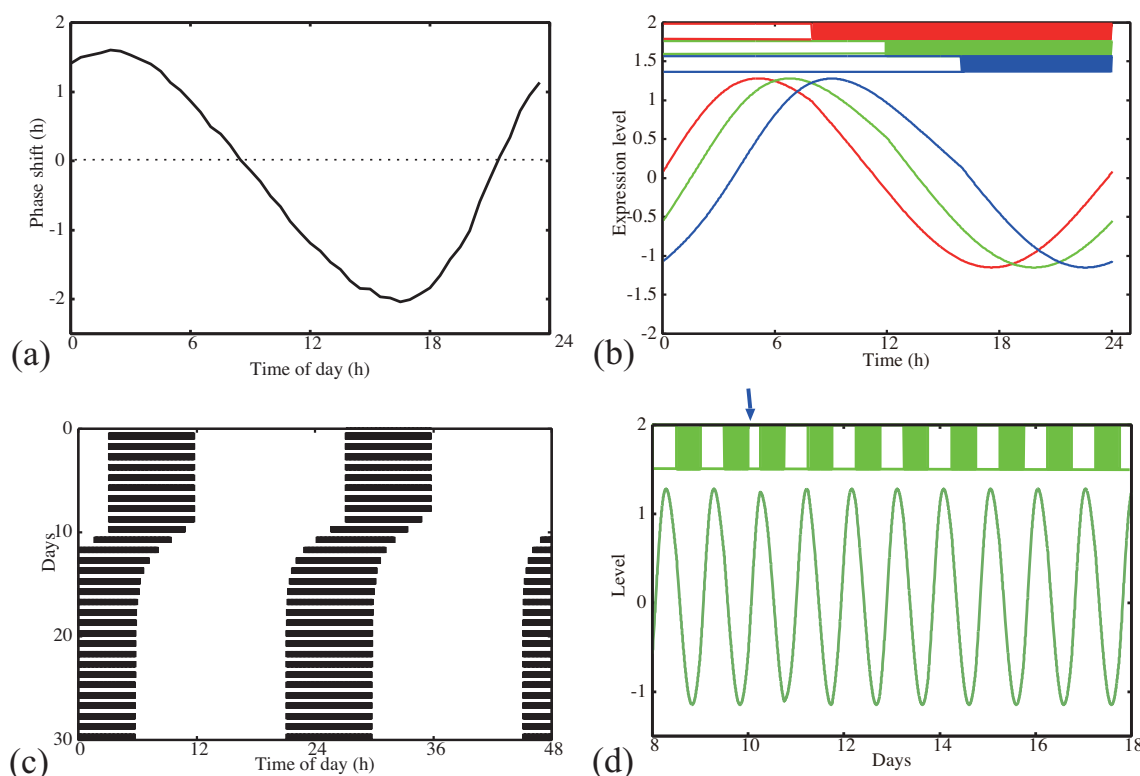

**Figure S2.** Simulation of the amplitude-phase oscillator model using one of the 100 parameter sets optimized for a  $\pm 2h$  PRC. (a) Phase response curve with respect to 6h light pulse. (b) Waveforms  $x(t)$  of the oscillator entrained to *Zeitgeber* signal with 8:16 LD (red), 12:12 LD (green), and 16:8 LD (blue). (c) Actogram drawn for the oscillator, to which a 6h advancing jet-lag was induced on day 10. (d) Time-trace  $x(t)$  of the oscillators, to which a 6h advancing jet-lag was induced on the 10th day. Parameter values:  $\tau = 24.64h$ ,  $A = 1.144$ ,  $\lambda = 0.50h^{-1}$ .
